# Supplementary material for: A Novel Polytetrahydrofuran-Based Shape Memory Polyurethane Enhanced by Polyglycolide-Block-Polytetrahydrofuran-Block-Polyglycolide Copolymer
Source: MDPI journal article supplement (doi:10.3390/polym16243610), 2024-12-23
Supplement: s1 [file polymers-3370356-supplementary.pdf › polymers-3370356-supplementary.pdf]

## Supporting Information

# **A Novel Polytetrahydrofuran Based Shape Memory Polyurethane Enhanced by Polyglycolide-*block*-Polytetrahydrofuran-*block*- Polyglycolide Copolymer**

*Xin Li*<sup>†,1</sup>, *Lingchen Mao*<sup>†,1</sup>, *Weiqian Li*<sup>†,1</sup>, *Han Wu*<sup>1</sup>, *Suyang Dai*<sup>1</sup>, *Rui Xiao*<sup>1</sup>, *Jiayi Huang*<sup>1</sup>,  
*Guodong Liu*<sup>\*,1,4</sup>, *Keda Yang*<sup>\*,2</sup>, *Wensheng Bu*<sup>3</sup>, *Ni Jiang*<sup>1</sup>, *Zhihua Gan*<sup>1</sup> and *Zhenbo Ning*<sup>\*,1</sup>

<sup>1</sup> State Key Laboratory of Organic-Inorganic Composites, Beijing Laboratory of Biomedical Materials, College of Life Science and Technology, Beijing University of Chemical Technology, Beijing 100029, China.

<sup>2</sup> Key Laboratory of Artificial Organs and Computational Medicine in Zhejiang Province, Shulan International Medical College, Zhejiang Shuren University, Hangzhou 310015, China

<sup>3</sup> CAS Key Laboratory of Engineering Plastics, Institute of Chemistry, Chinese Academy of Sciences (CAS), Beijing 100190, China

<sup>4</sup> IMEIK Technology Development Co., LTD, Beijing 100010, China

E-mail: liuguodong@imeik.com, kdyang@zjsru.edu.cn, zbning@mail.buct.edu.cn

<sup>†</sup> These authors contributed equally to this work.

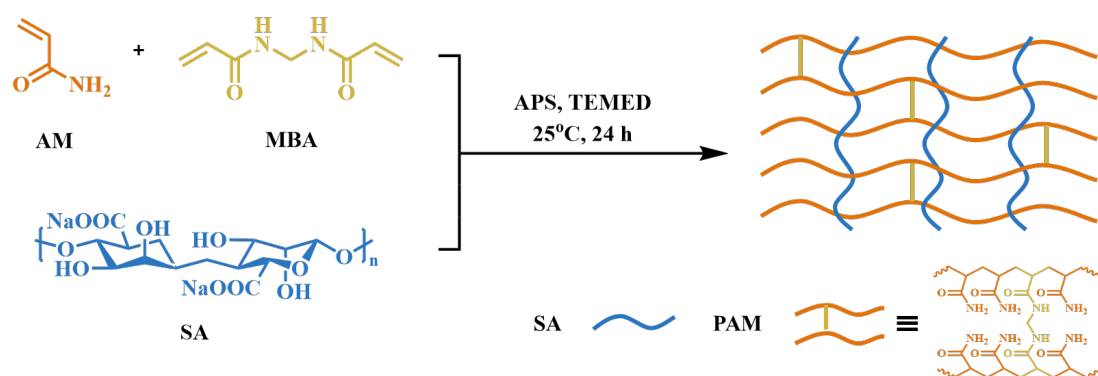

**Figure S1.** The reaction scheme of the hydrogel

**Table S1.** Characteristics of the synthesized PGA-PTHF-PGA block polymer.

| Sample       | $M_n^a$ | $M_w^a$ | $M_n^b$ | PDI <sup>a</sup> |
|--------------|---------|---------|---------|------------------|
| PTHF         | 1400    | 1700    | 2900    | 1.21             |
| PGA-PTHF-PGA | 2900    | 3500    | 3800    | 1.23             |

<sup>a</sup> Number-averaged molecular weight ( $M_n$ ), weight-averaged molecular weight ( $M_w$ ) and molecular weight distribution (PDI) were measured by GPC.

<sup>b</sup> Calculated from  $^1\text{H}$  NMR results.

**Table S2.** Tensile properties of the PU-GT films.

| Sample    | $\sigma_b^a$ / MPa | $\varepsilon_m^b$ / % | Toughness <sup>c</sup> / MJ m <sup>-3</sup> |
|-----------|--------------------|-----------------------|---------------------------------------------|
| PU-GT-0   | 26.0 $\pm$ 1.7     | 917.5 $\pm$ 33.4      | 141.9 $\pm$ 12.0                            |
| PU-GT-33  | 34.0 $\pm$ 3.6     | 1043.6 $\pm$ 17.7     | 163.0 $\pm$ 15.2                            |
| PU-GT-50  | 35.6 $\pm$ 3.4     | 1012.9 $\pm$ 29.0     | 140.5 $\pm$ 5.7                             |
| PU-GT-66  | 14.1 $\pm$ 0.1     | 950.2 $\pm$ 27.7      | 48.6 $\pm$ 1.8                              |
| PU-GT-100 | 2.0 $\pm$ 0.5      | 814.7 $\pm$ 40.2      | 20.7 $\pm$ 4.2                              |

<sup>a</sup>  $\sigma_b$  was the tensile strength of the samples.

<sup>b</sup>  $\varepsilon_m$  was the elongation at break of the samples.

<sup>c</sup> The toughness of the samples were derived from integration their stress-strain curves.
